# Supplementary material for: Molecular mechanisms mediating the beneficial metabolic effects of [Arg4]tigerinin-1R in mice with diet-induced obesity and insulin resistance
Source: publisher site journal article supplement (doi:10.1515/hsz-2016-0120), 2016-03-11
Supplement: Supplementary file 1 [file Supplementary Figures.doc]

**Supplementary Figure 1.** Effects of [Arg4]igerinin-1R on body composition in lean and high-fat fed mice. Mice were treated with twice-daily injections of saline or [Arg4]tigerinin-1R (75 nmol/kg body weight) for 28 days prior to (A) DEXA scan and computation of data on (B) bone mineral density, (C) bone mineral content, (D) bone area, (E) lean body mass and (F, G) body fat. Values are means±SEM for 8 mice. ***p*<0.01, ****p*<0.001 compared with lean control. Δ*p*<0.05, ΔΔ*p*<0.01 compared with high-fat control.

**Supplementary Figure 2.** Effects of [Arg4]tigerinin-1R on (A) islet morphology, (B) computed islet number, (C) islet area, (D) beta cell area and (E) alpha cell area in lean and high-fat fed mice. Mice were treated with twice-daily injections of saline or [Arg4]tigerinin-1R (75 nmol/kg body weight) for 28 days. Values are mean±SEM for 8 observations (~120 islets per group). **p*<0.05, ***p*<0.01, ****p*<0.001 compared to lean control.

**Supplementary Figure 3.** Effects of [Arg4]tigerinin-1R on (A) plasma lipid profile and serum concentrations of (B) aspartic acid transaminase, AST, (C) alkaline phosphatase, ALP, (D) alanine transaminase, ALT, and (E) creatinine in lean and high-fat fed mice. Mice were treated with twice-daily injections of saline or [Arg4]tigerinin-1R (75 nmol/kg body weight) for 28 days. Values are mean±SEM with n=8. **p*<0.05, ***p*<0.01, ****p*<0.001 compared with lean controls. Δ*p*<0.05, ΔΔ*p*<0.05 compared with high-fat controls.

**Supplementary Figure 4**. KATP channel activation by diazoxide exhibits no rundown in BRIN-BD11 clonal β cells. (A) Membrane current recorded at -80 mV obtained during voltage ramp protocols applied every 5 s, plotted before and during the application of the KATP channel activator, diazoxide (200 μM). (B) Representative traces showing currents at points indicated panel A generated by the application of the voltage ramp protocol illustrated in the lower panel (1 s ramp from +20 to -80 mV applied every 5 s) under (i) initial conditions (130 mm external K+) and (ii and iii) after application of diazoxide for the same time period as during testing of [Arg4]tigerinin-1R.
